# Supplementary material for: Superior photocatalytic behaviour of novel 1D nanobraid and nanoporous α-Fe2O3 structures
Source: Royal Society of Chemistry journal article supplement (doi:10.1039/c2ra20608k), 2012-01-01
Supplement: c2ra20608k.pdf [file c2ra20608k.pdf]

## Superior photocatalytic behaviour of novel 1D nanobraids and nanoporous $\alpha$ - $\text{Fe}_2\text{O}_3$

J. Sundaramurthy<sup>a,c\*</sup>, P. Suresh Kumar<sup>a,c</sup>, M. Kalaivani<sup>b</sup>, V. Thavasi<sup>c\*</sup>, S. G. Mhaisalkar<sup>a</sup>, and S. Ramakrishna<sup>b,c\*</sup>

<sup>a</sup>*School of Materials Science and Engineering, Nanyang Technological University, 50 Nanyang Avenue, Singapore 639798.*

<sup>b</sup>*Mechanical Engineering, National University of Singapore, Singapore 117576.*

<sup>c</sup>*NUS Nanoscience and Nanotechnology Initiative, National University of Singapore, Singapore 117576.*

\* *E-mail: seeram@nus.edu.sg; velnanotech@gmail.com; sundaram1304@gmail.com*

*Fax: +65 6872 5563; Tel: +65 6516 6593.*

### Supplementary information:

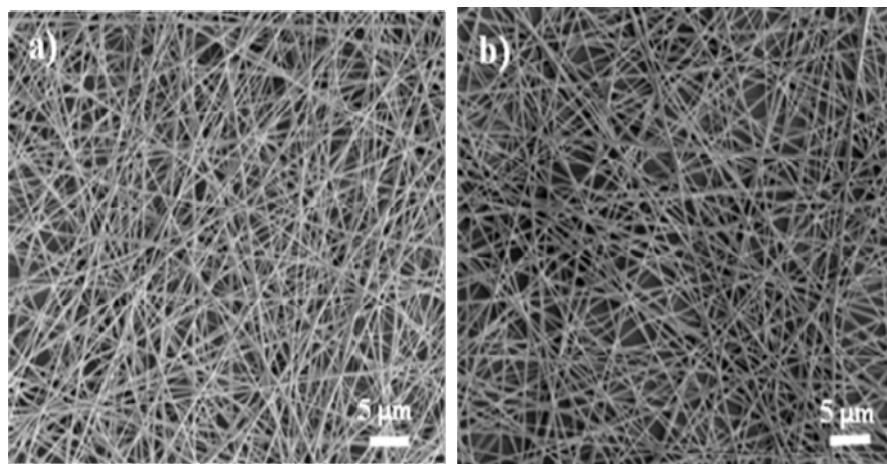

**Fig. S1** SEM images of (a) 4 wt% and (b) 6 wt%  $\text{Fe}(\text{acac})_3/\text{PVP}$  composite fibers at 15 kV and 18 kV power supply.

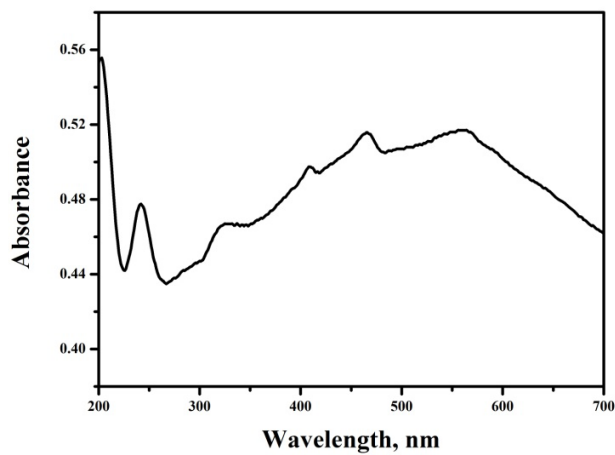

**Fig. S2.** UV-Visible absorption spectrum of  $\alpha$ -Fe<sub>2</sub>O<sub>3</sub> nanobraid structures.

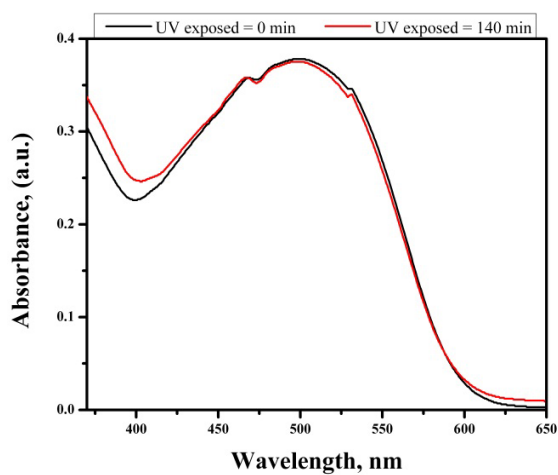

**Fig. S3.** UV-Visible absorption spectrum of congo red dye in the absence of  $\alpha$ -Fe<sub>2</sub>O<sub>3</sub> nanostructures before and after 140 min of UV exposure.
